# Supplementary figures and images for: Rheological Behavior of Carbon Nanotubes as an Additive on Lithium Grease
Source: Hindawi journal article supplement (doi:10.1155/2013/279090), 2013-01-01

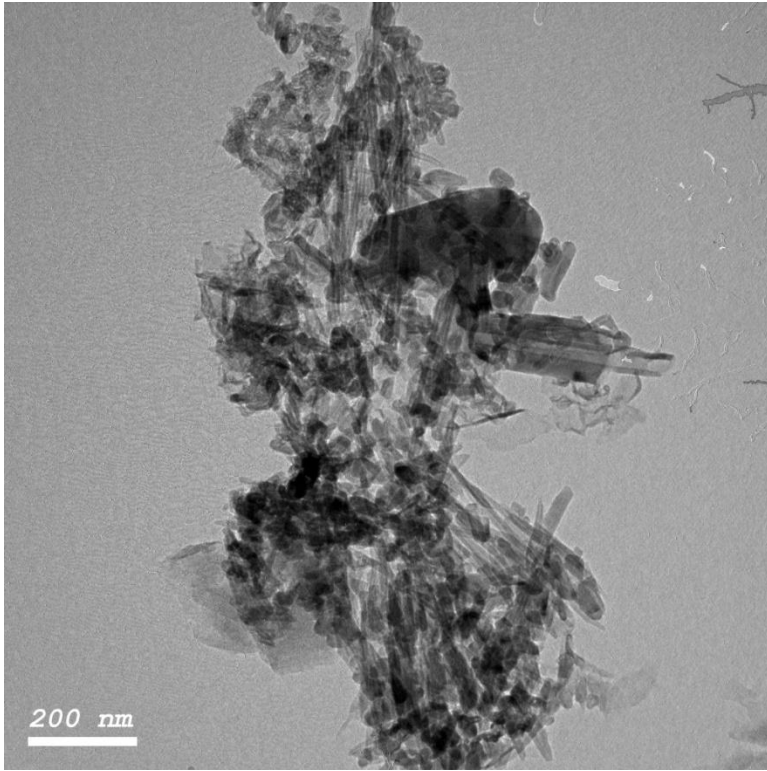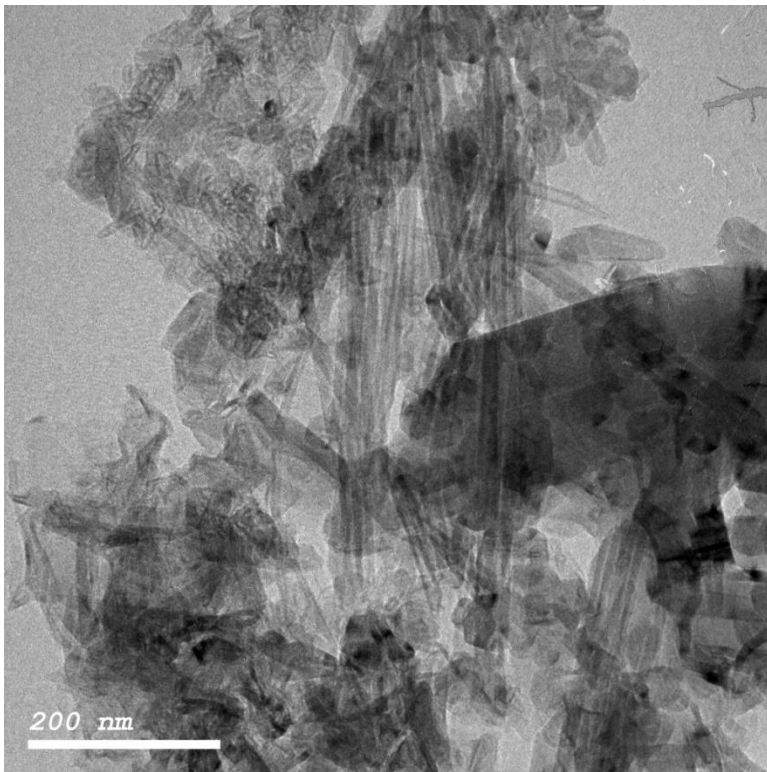

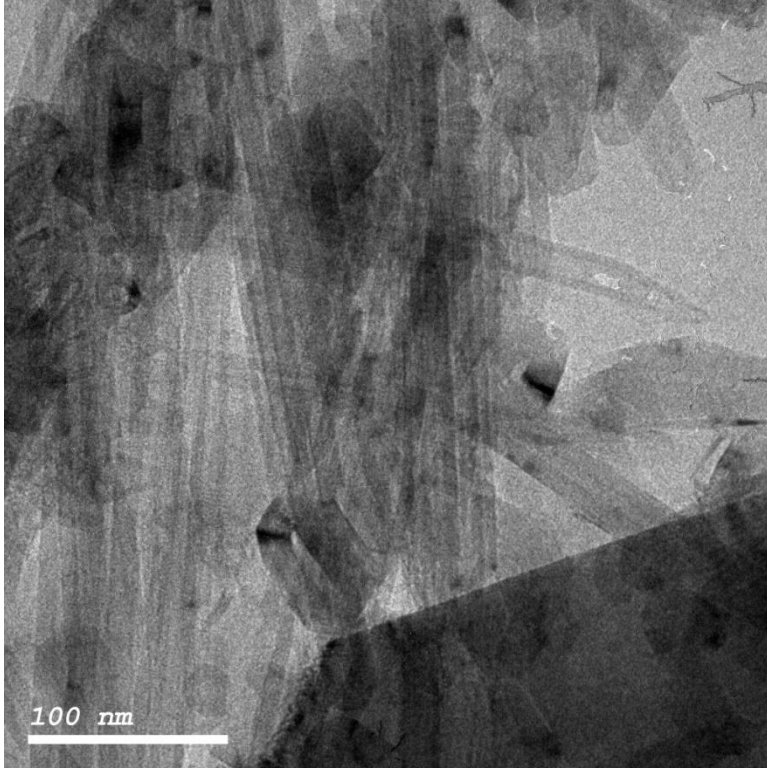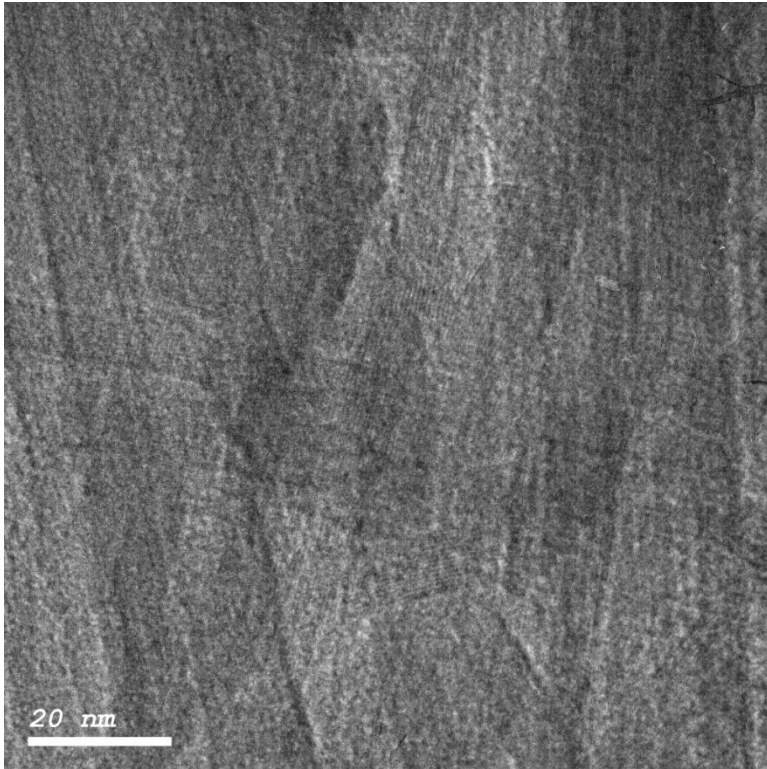

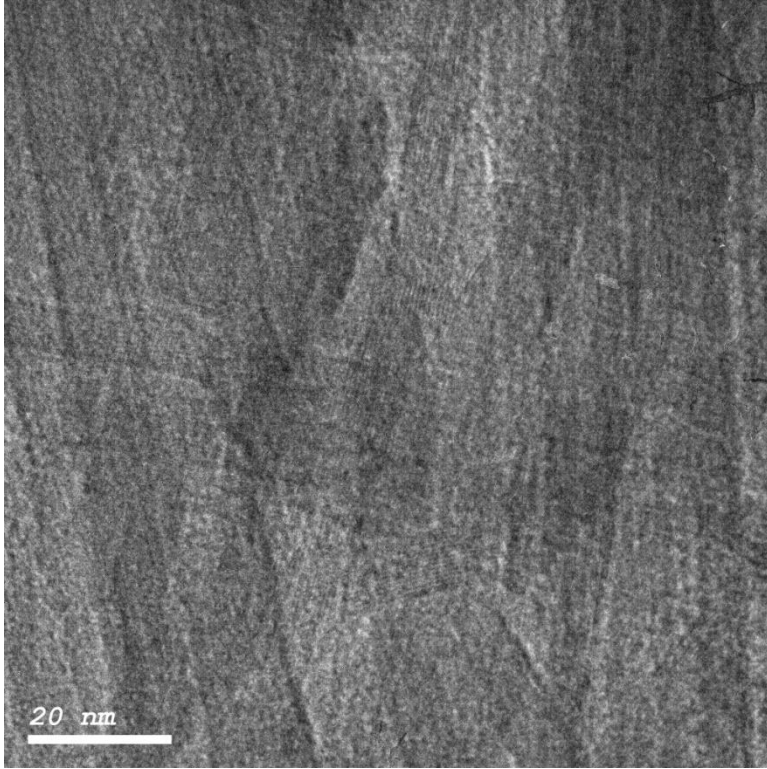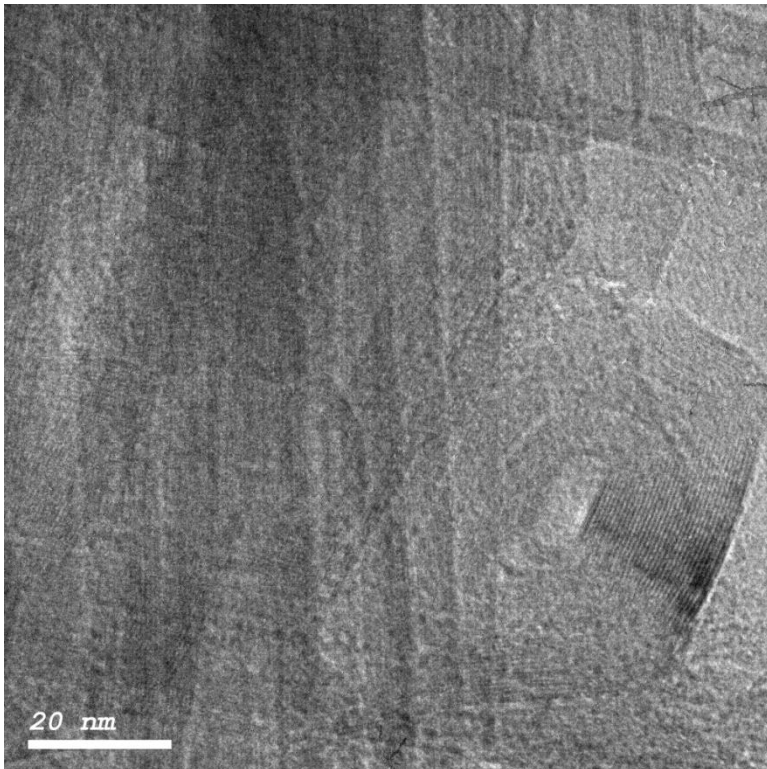

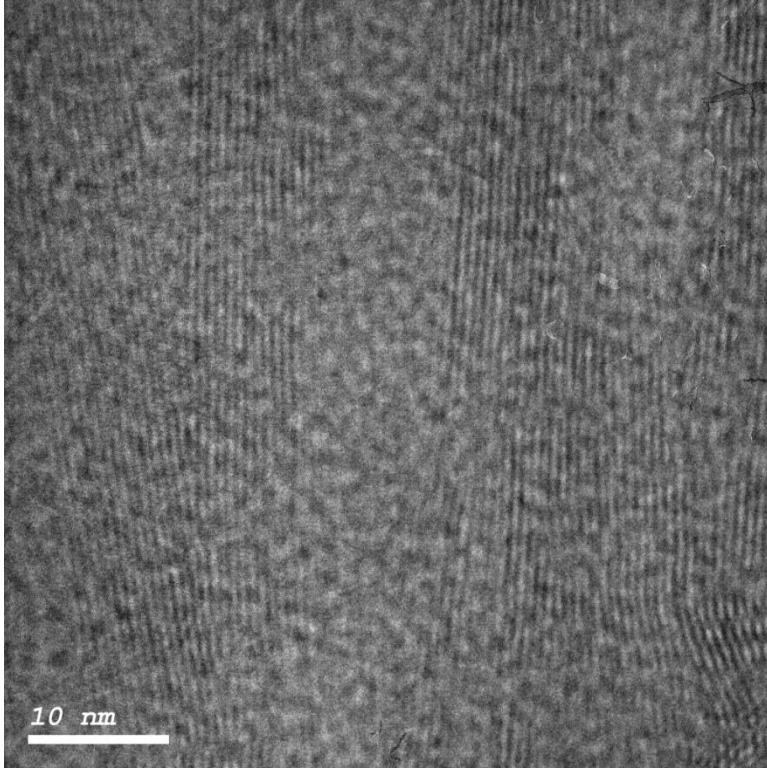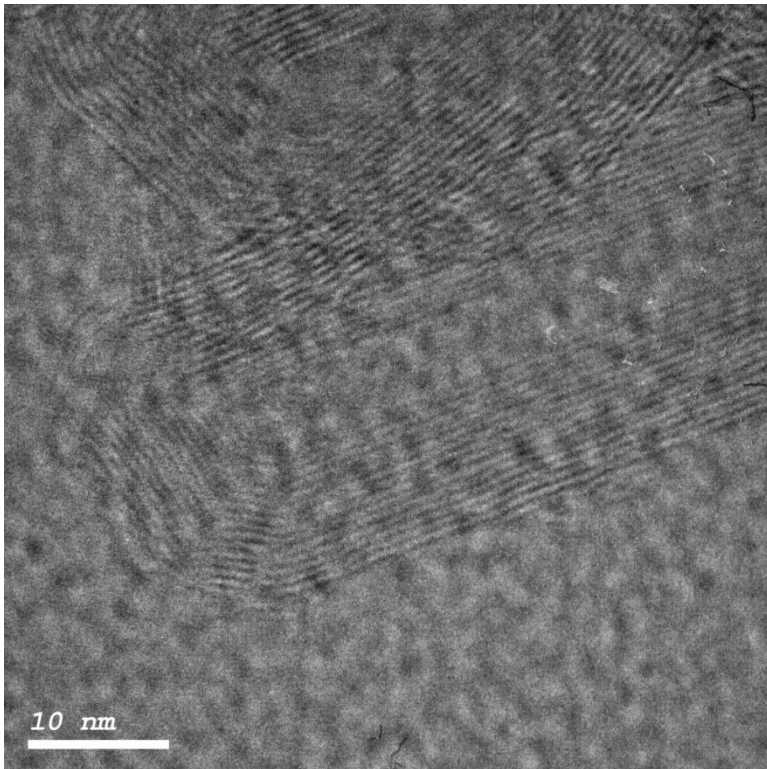

Supplement: f1 [file 279090.f1.pdf]
